# Supplementary material for: Implementing an Evidence-Based COPD Hospital Discharge Protocol: A Narrative Review and Expert Recommendations
Source: PubMed Central journal article supplement — Adv Ther. 2023 Aug 4;40(10):4236–63. doi: 10.1007/s12325-023-02609-8 (PMC10499689; doi:10.1007/s12325-023-02609-8), 2023-08-04
Supplement: 12325_2023_2609_MOESM1_ESM.pdf [file 12325_2023_2609_MOESM1_ESM.pdf]

# **Implementing an Evidence-Based COPD Hospital Discharge Protocol: A Narrative Review and Expert Recommendations**

Marc Miravittles<sup>1</sup>, Mohit Bhutani<sup>2</sup>, John R Hurst<sup>3</sup>, Frits ME Franssen<sup>4</sup>, Job FM van Boven<sup>5</sup>,  
Ee Ming Khoo<sup>6</sup>, Jing Zhang<sup>7</sup>, Stephen Brunton<sup>8</sup>, Daiana Stolz<sup>9</sup>, Tonya Winders<sup>10</sup>,  
Kazuhisa Asai<sup>11</sup>, Jane E Scullion<sup>12</sup>

<sup>1</sup>Pneumology Department, Vall d'Hebron University Hospital / Vall d'Hebron Research Institute (VHIR), Vall d'Hebron Barcelona Hospital Campus, Barcelona, Spain. ORCID: <https://orcid.org/0000-0002-9850-9520>; <sup>2</sup>Division of Pulmonary Medicine, Department of Medicine, University of Alberta, Edmonton, Alberta, Canada. ORCID: <https://orcid.org/0000-0002-1911-4169>; <sup>3</sup>UCL Respiratory, University College London, London, UK. ORCID: <https://orcid.org/0000-0002-7246-6040>; <sup>4</sup>Department of Respiratory Medicine, Maastricht University Medical Center, Maastricht, Netherlands. ORCID: <https://orcid.org/0000-0002-1633-6356>; <sup>5</sup>Department of Clinical Pharmacy & Pharmacology, Groningen Research Institute for Asthma and COPD (GRIAC), University Medical Center Groningen, University of Groningen, Groningen, Netherlands. ORCID: <https://orcid.org/0000-0003-2368-2262>; <sup>6</sup>Department of Primary Care Medicine, Faculty of Medicine, Universiti Malaya, Kuala Lumpur, Malaysia; International Primary Care Respiratory Group, UK. ORCID: <https://orcid.org/0000-0003-3191-1264>; <sup>7</sup>Department of Pulmonary and Critical Care Medicine, Zhongshan Hospital, Shanghai Medical College, Fudan University, Shanghai, China. ORCID: <https://orcid.org/0000-0001-5305-6233>; <sup>8</sup>US Primary Care Respiratory Group, Winnsboro, SC, USA. ORCID: <https://orcid.org/0000-0003-0322-0060>; <sup>9</sup>Clinic of Respiratory Medicine and Faculty of Medicine, University of Freiburg, Freiburg, Germany. ORCID: <https://orcid.org/0000-0003-0099-882X>; <sup>10</sup>Global Allergy and Airways Patient Platform, Vienna, Austria. ORCID: <https://orcid.org/0000-0001-7689-6438>; <sup>11</sup>Department of Respiratory Medicine, Osaka Metropolitan University, Osaka, Japan. ORCID: <https://orcid.org/0000-0001-8400-863X>; <sup>12</sup>Independent Researcher, Leicester, UK. ORCID: <https://orcid.org/0000-0002-3874-9469>

## **Corresponding author:**

Marc Miravittles

Email: [marcm@separ.es](mailto:marcm@separ.es)

# Implementing an Evidence-Based COPD Hospital Discharge Protocol: A Narrative Review and Expert Recommendations

Marc Miravittles, Mohit Bhutani, John R. Hurst, Frits M.E. Franssen, Job F.M. van Boven, Ee Ming Khoo, Jing Zhang, Stephen Brunton, Daiana Stolz, Tonya Winders, Kazuhisa Asai, Jane E. Scullion

## 7 STRATEGIES

for implementation of the discharge protocol

### Audit and feedback

- Regular audits should be conducted and compliance with the discharge protocol should be measured
- Regular feedback should be provided to relevant staff

### Change champions

Local 'change champions' should be selected and made responsible for:

- Providing additional training and motivating staff
- Performing audits and providing regular feedback to staff
- Monitoring compliance
- Driving protocol implementation across multiple hospitals

### Reminders

#### Physical reminders

Checklists, goal sheets, posters

and/or

#### Digital reminders

Screen savers, alarms, EMR alerts should be used to prompt staff to carry out the discharge protocol

### HCP education

Training materials and meetings should be provided to arm relevant staff with the appropriate knowledge and understanding of the individual elements and overall benefits of the protocol

### Barrier identification and tailored interventions

- Interviews, focus group discussions and surveys should be performed to identify barriers to successful protocol implementation
- Tailored interventions can then be designed to address these barriers

### Multidisciplinary collaboration

- The discharge protocol, including roles and responsibilities, completion rates, and barrier identification and resolution should be discussed at MDT meetings (including both primary and secondary care) to encourage effective collaboration
- Comprehensive discharge summaries and their timely transmission to primary care colleagues should be prioritised

### Financial incentives

If possible, hospitals should be given financial incentives to implement the discharge protocol

COPD, chronic obstructive pulmonary disease; EMR, electronic medical record; HCP, healthcare professional; MDT, multidisciplinary team

The infographic represents the opinions of the authors. For a full list of declarations, including funding and author disclosure statements, and copyright information, please see the full text online.

PEER-REVIEWED  
FEATURE

Adis
